# Supplementary material for: Crystal facet growth behavior and thermal stability of {001} faceted anatase TiO2: mechanistic role of gaseous HF and visible-light photocatalytic activity
Source: Royal Society of Chemistry journal article supplement (doi:10.1039/c2ce26702k), 2012-12-17
Supplement: c2ce26702k.pdf [file c2ce26702k.pdf]

Electronic Supplementary Information (ESI)

**Crystal facet growth behavior and thermal stability of {001}  
faceted anatase TiO<sub>2</sub>: mechanistic role of gaseous HF and  
visible-light photocatalytic activity**

**Wei Wang, Chunhua Lu\*, Yaru Ni and Zhongzi Xu\***

State Key Laboratory of Materials-Orient Chemical Engineering, College of Materials  
Science and Engineering, Nanjing University of Technology, Nanjing 210009, PR  
China

**Corresponding author: [lchnjut@163.com](mailto:lchnjut@163.com) (Lu Chunhua)**

**[xzznjut@163.com](mailto:xzznjut@163.com)**

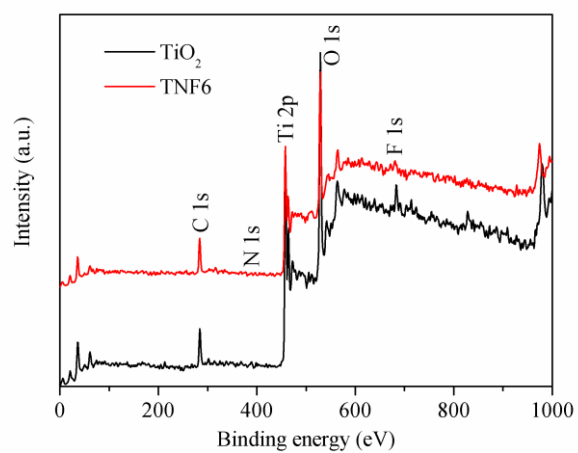

Fig. S1 Surface chemical composition of TiO<sub>2</sub> nanosheets and TNF6
